# Supplementary material for: The Environmental Conditions, Treatments, and Exposures Ontology (ECTO): connecting toxicology and exposure to human health and beyond
Source: PubMed Central journal article supplement (PMC9951428; doi:10.1186/s13326-023-00283-x), 2023-02-24
Supplement: 13326_2023_283_MOESM2_ESM.pdf [file 13326_2023_283_MOESM2_ESM.pdf]

1 **Supplemental Table 2.** Comparison of ECTO scope to other ontologies

| <b>Ontology</b>                                              | <b>Status</b> | <b>No. of Classes</b> | <b>Scope</b>                                                     | <b>Description</b>                                                               | <b>URL or Reference</b>                                                                                                                                     |
|--------------------------------------------------------------|---------------|-----------------------|------------------------------------------------------------------|----------------------------------------------------------------------------------|-------------------------------------------------------------------------------------------------------------------------------------------------------------|
| Environmental Conditions, Treatments, and Exposures Ontology | Active        | 2763                  | Exposures to environments, substances, behaviors, and scenarios. | A structured vocabulary for experimental, clinical, and natural world exposures. | <a href="https://github.com/EnvironmentOntology/environmental-exposure-ontology">https://github.com/EnvironmentOntology/environmental-exposure-ontology</a> |

2

| <b>Ontology</b>                 | <b>Status</b> | <b>No. of Class references in ECTO</b> | <b>Scope</b>                             | <b>Description</b>                               | <b>URL or Reference</b>                                                                                           |
|---------------------------------|---------------|----------------------------------------|------------------------------------------|--------------------------------------------------|-------------------------------------------------------------------------------------------------------------------|
| Environment Ontology (ENVO)     | Active        | 333                                    | Environmenta<br>l features and habitats  | Concise, controlled description of environments. | [39]<br><br><a href="https://github.com/EnvironmentOntology/envo">https://github.com/EnvironmentOntology/envo</a> |
| Exposure Science Ontology (ExO) | Active        | 57                                     | Higher level environmenta<br>l structure | Vocabularies for describing exposure data        | [20]<br><br><a href="https://github.com">https://github.com</a>                                                   |

|                                                  |        |      |                                |                                                                                                                  |                                                                                                     |
|--------------------------------------------------|--------|------|--------------------------------|------------------------------------------------------------------------------------------------------------------|-----------------------------------------------------------------------------------------------------|
|                                                  |        |      |                                | to inform understanding of environmental health.                                                                 | <a href="#">/CTDbase/exposu</a><br><a href="#">re-ontology</a>                                      |
| Chemical Entities of Biological Interest (ChEBI) | Active | 2170 | Chemicals, molecular entities  | A structured classification of molecular entities of biological interest focusing on 'small' chemical compounds. | [14]<br><a href="https://github.com/ebi-chebi/ChEBI">https://github.com/ebi-chebi/ChEBI</a>         |
| Food Ontology (FoodOn)                           | Active | 169  | Food material, food processing | A controlled vocabulary of food products and entities bearing a "food role"                                      | [40]<br><a href="https://github.com/FoodOntology/foodon">https://github.com/FoodOntology/foodon</a> |
| National Cancer Institute                        | Active | 48   | Broad coverage of the cancer   | A thesaurus of cancer related diseases,                                                                          | [41]                                                                                                |

|                                                                                                                  |        |    |                                                                 |                                                                                                                    |                                                                                                                                                                                                                                                                      |
|------------------------------------------------------------------------------------------------------------------|--------|----|-----------------------------------------------------------------|--------------------------------------------------------------------------------------------------------------------|----------------------------------------------------------------------------------------------------------------------------------------------------------------------------------------------------------------------------------------------------------------------|
| Thesaurus<br>(NCIT)                                                                                              |        |    | domain                                                          | findings and<br>abnormalities                                                                                      |                                                                                                                                                                                                                                                                      |
| Experimental<br>Conditions<br>Ontology<br>(XCO)                                                                  | Active | 0  | Internal and<br>external<br>environmenta<br>l conditions        | A vocabulary of<br>conditions under<br>which<br>physiological<br>and<br>morphological<br>measurements<br>are made. | <a href="https://jbiomedsem.biomedcentral.com/articles/10.1186/2041-1480-4-26">https://jbiomedsem.biomedcentral.com/articles/10.1186/2041-1480-4-26</a><br><br><a href="http://www.obofoundry.org/ontology/xco.html">http://www.obofoundry.org/ontology/xco.html</a> |
| National<br>Center for<br>Biotechnology<br>Information<br>(NCBI)<br>Organismal<br>Classification<br>(NCBI taxon) | Active | 11 | Organism<br>taxonomy                                            | A classification<br>and<br>nomenclature<br>for all of the<br>organisms in the<br>public sequence<br>databases.     | [42]                                                                                                                                                                                                                                                                 |
| Ecocore                                                                                                          | Active | 0  | ecological<br>entities, such<br>as ecological<br>functions (for | Concise and<br>controlled<br>description of<br>ecological traits                                                   | <a href="https://github.com/ECOCORE/ECOCORE">https://github.com/ECOCORE/ECOCORE</a>                                                                                                                                                                                  |

|                                                   |        |   |                                                                |                                                               |                                                                                                                                                                       |
|---------------------------------------------------|--------|---|----------------------------------------------------------------|---------------------------------------------------------------|-----------------------------------------------------------------------------------------------------------------------------------------------------------------------|
|                                                   |        |   | predators, prey, etc), food webs, and ecological interactions. | of organisms.                                                 |                                                                                                                                                                       |
| Zebrafish Experimental Conditions Ontology (ZECO) | Active | 0 | Experimental conditions for zebrafish                          | Descriptions of experimental conditions applied to zebrafish. | [34]<br><a href="https://github.com/ybradford/zebrafish-experimental-conditions-ontology">https://github.com/ybradford/zebrafish-experimental-conditions-ontology</a> |
| Plant Experimental Conditions Ontology (PECO)     | Active | 0 | Experimental conditions for plants                             | Descriptions of experimental conditions applied to plants.    | [35]<br><a href="https://github.com/Planteome/plant-experimental-conditions-ontology">https://github.com/Planteome/plant-experimental-conditions-ontology</a>         |

3

4 The ontologies and resources indicated within this table are utilized as imports within ECTO to  
5 support its precomposed exposure classes. In addition to the listed ontologies, ECTO also  
6 imports Gene Ontology, Information Artifact Ontology (IAO), Medical Actions Ontology (MAxO),

7 Neuro Behavior Ontology (NBO), NanoParticle Ontology (NPO), Phenotype and Trait Ontology  
8 (PATO), Relation Ontology (RO), and Uber-anatomy Ontology (UBERON).  
9
